1 **Mobbing-like response to secondary predator cues is not a form of teaching in**  
2 **meerkats**

3

4 Isabel Driscoll<sup>1,2,3</sup>, Marta Manser<sup>2,3</sup>, Alex Thornton<sup>1</sup>

5

6 1. Centre for Ecology and Conservation, University of Exeter, Penryn Campus, Penryn,  
7 Cornwall TR10 9FE, UK

8 2. Department of Evolutionary Biology and Environmental Studies, University of Zurich,  
9 Winterthustrasse 190, 8057 Zürich, Switzerland

10 3. Kalahari Meerkat Project, Kuruman River Reserve, Northern Cape, South Africa

11

12 Corresponding author: [isabel.driscoll@ieu.uzh.ch](mailto:isabel.driscoll@ieu.uzh.ch)

13

14 **Abstract**

15 *Across many taxa, individuals learn how to detect, recognise and respond to predators via*  
16 *social learning. Learning to recognise and interpret predator cues is essential in the accurate*  
17 *assessment of risk. Cues can come directly from a predator's presence (visual, acoustic) or*  
18 *from secondary predator cues (SPCs, such as hair/feathers, urine or faeces) left in the*  
19 *environment. Animals show various responses to encountering SPCs, which are thought to*  
20 *act in reducing risk to the individual. Meerkats, *Suricata suricatta*, show a response to SPCs*  
21 *not described in any other species: they display a mobbing-like behaviour. The function of this*  
22 *behaviour is unclear as unlike mobbing, the response it so closely resembles, it cannot serve*  
23 *to drive predators away. We used experiments to investigate whether adults may use this*  
24 *mobbing-like response to teach naïve young how to recognise and respond to predators.*  
25 *Meerkats are known to teach pups hunting skills, but there is as yet no evidence that any*  
26 *species other than humans teaches across multiple contexts. We used experimental*  
27 *presentations of SPCs to test whether wild adult meerkats respond more intensely to SPCs in*

28 *the presence of naïve pups, as would be expected if the behaviour serves to promote learning.*  
29 *Contrary to this prediction, response intensity was lower when pups were present than when*  
30 *they were absent, and declined as the number of pups in the group increased, possibly due*  
31 *to costs associated with foraging with dependent young. Response intensity instead increased*  
32 *with increasing group size, number of group members interacting with the cue, and varied with*  
33 *predator cue type. These results suggest that the mobbing-like response to SPCs is not a*  
34 *form of teaching in meerkats. Instead, this behaviour may function to increase the recruitment*  
35 *of others to investigate the SPC. Exposing group members to SPCs may better inform them*  
36 *of the nature of the threat, facilitating more effective defensive group responses.*

37

38 **Key words:** animal behaviour, defensive responses, predator cues, social learning, teaching

39

## 40 **Introduction**

41

42 The ability of prey animals to mount appropriate defensive behaviours in the face of predation  
43 is vital to survival. Accurately assessing current predation risk aids in informing risk-  
44 appropriate behaviours, limiting unnecessary time and energy expenditure on non-acute or  
45 non-immediate threats. Individuals can gauge predation risk through personal assessment of  
46 the current situation and from the risk assessments of others, by using social information (Dall  
47 *et al.* 2005; Crane & Ferrari 2013). Access to social information is thought to be a key benefit  
48 of group living, aiding in detecting, recognising and responding appropriately to predators. In  
49 animals across many taxa, social learning plays an important role in shaping the development  
50 of appropriate responses to predators (see reviews: Griffin 2004; Crane & Ferrari 2013). One  
51 common antipredator behavioural response that is often learnt via social learning is mobbing  
52 (Curio *et al.* 1978a; Davies & Welbergen 2009; Cornell *et al.* 2012; Feeney & Langmore 2013;  
53 Griesser & Suzuki 2017).

54

55 Mobbing is a method of predator deterrence which involves individuals gathering around and  
56 investigating a potential threat, and in many species is accompanied by the production of  
57 distinctive calls (Curio *et al.* 1978b; Graw & Manser 2007). Mobbing is conspicuous and costly  
58 in terms of time and energy expenditure, advertises an individual's location, and may increase  
59 the risk of injury or death (Curio *et al.* 1978b; Krama & Krams 2005; Tórréz *et al.* 2012), but it  
60 can also provide important advantages. For instance, mobbing may offer opportunities for  
61 individuals to learn to recognise and respond appropriately towards predators by observing  
62 conspecifics' behaviour. Naïve juvenile Siberian jays, *Perisoreus infaustus*, for example, learnt  
63 to both recognise and mob a predatory goshawk, *Accipiter gentilis*, following a single  
64 observation of a knowledgeable individual mobbing the predator (Griesser & Suzuki 2017).  
65 However, the principal benefit of mobbing is thought to be predator deterrence, either by  
66 intimidating and driving away the predator, or by alerting it that it has been detected and thus  
67 reducing the chance of successful attack (Abolins-Abols & Ketterson, 2017; Caro, 2005).  
68 While the benefits of mobbing and driving a predator away are clear, meerkats, *Suricata*  
69 *suricatta*, also exhibit a rather perplexing form of behaviour, where they show mobbing-like  
70 responses towards secondary predator cues (SPCs).

71

72 Secondary predator cues are cues left in the environment by predators; such as fur, urine,  
73 faeces, feathers, scent markings and regurgitation pellets, sometimes referred to as either  
74 direct or indirect cues (Persons *et al.* 2001; Severud *et al.* 2011; Nersesian *et al.* 2012; Zöttl  
75 *et al.* 2013). These cues can indicate predator presence in the vicinity and provide information  
76 about the nature of the threat. In most cases prey avoid SPCs or respond with defensive  
77 behaviours such as increased vigilance (Monclús *et al.* 2005; Zidar & Løvlie 2012; Garvey *et*  
78 *al.* 2016; Tanis *et al.* 2018), reduced activity (Persons *et al.* 2001; Sullivan *et al.* 2002;  
79 Lehtiniemi 2005), refuge use (McGregor *et al.* 2002; Sullivan *et al.* 2002; Ferrari *et al.* 2006;  
80 Belton *et al.* 2007), and moving away from the cue (Amo *et al.* 2004; Shrader *et al.* 2008; Mella  
81 *et al.* 2014). However, some species respond by approaching and inspecting SPCs,  
82 presumably to gain further information about the source of the cue (Belton *et al.* 2007; Furrer

83 & Manser 2009; Zöttl *et al.* 2013; Garvey *et al.* 2016; Collier *et al.* 2017). Some species are  
84 able to ascertain the type of predator (Van Buskirk 2001; McGregor *et al.* 2002; Mella *et al.*  
85 2014), predator size (Kusch *et al.* 2004), age of the cue (Barnes *et al.* 2002; Zöttl *et al.* 2013;  
86 Kuijper *et al.* 2014) and the predator's diet from these cues (Mathis & Smith 1993; Apfelbach  
87 *et al.* 2015). Meerkats take this inspection behaviour one step further by responding to SPCs  
88 in a very similar manner to that shown when they mob real predators. To our knowledge,  
89 meerkats are the only species to show such mobbing-like responses to SPCs. Other  
90 mongoose species, such as dwarf and banded mongooses, do recruit to and inspect SPCs  
91 (Furrer & Manser 2009; Collier *et al.* 2017), however, meerkats show a more overt, higher  
92 arousal, behavioural response. When meerkats encounter SPCs they approach and  
93 investigate the cues, raising their tails, piloerecting (raising their fur) and making recruitment  
94 calls. These responses are all characteristic features of meerkat mobbing behaviour (Graw &  
95 Manser 2007), but in contrast to true mobbing, the mobbing-like response towards SPCs  
96 serves no function in deterring predators (see figure 1 for comparison). The potential benefit  
97 of responding to a SPC as if it were the predator itself is thus very unclear, particularly given  
98 that the response is conspicuous and involves time and energy costs. One potential function  
99 of the mobbing-like response towards SPCs by meerkats could be to act as a form of teaching  
100 for naïve young.

101

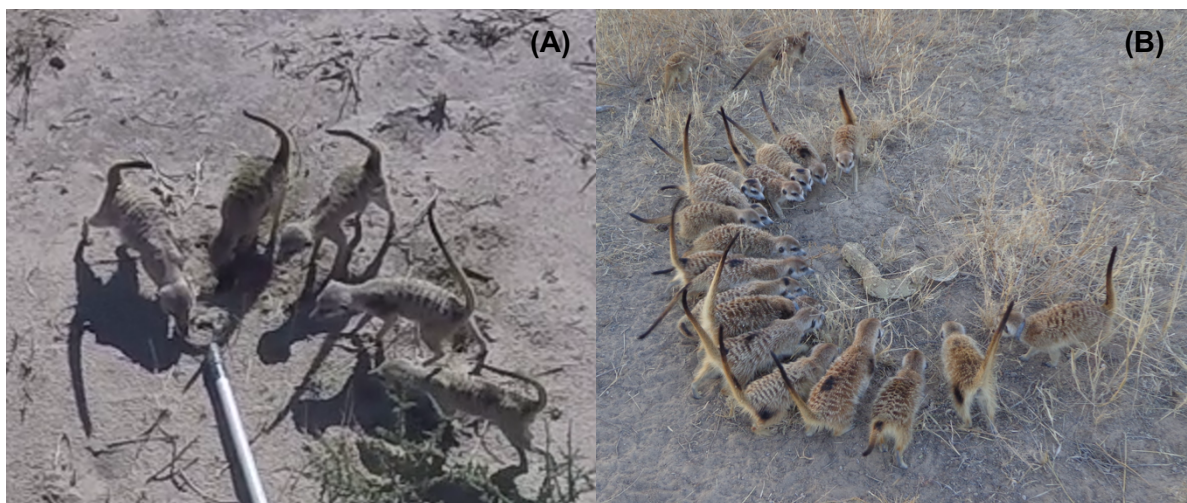

102

103 **Figure 1** – (A) Meerkats' mobbing-like response to experimental SPC presentation, (B) meerkats' mobbing response to a predatory puff adder, *Bitis arietans*, (Photo: Jess Snow)

104

105 Teaching is a form of active social learning whereby knowledgeable individuals invest in  
106 promoting learning by the naïve (Thornton & Raihani 2008). According to established  
107 operational criteria, teaching involves (i) an individual, A, modifying its behaviour in the  
108 presence of a naïve observer, B, (ii) A incurs a cost or no immediate benefit by doing so, (iii)  
109 as a result of A's behaviour B acquires a skill or knowledge faster than it would have otherwise,  
110 if at all (Caro & Hauser 1992). Teaching was once regarded as uniquely human, but there is  
111 now strong experimental evidence for teaching in a handful of non-human animals including  
112 meerkats (Thornton & McAuliffe 2006), tandem-running ants, *Temnothorax albipennis* (Franks  
113 & Richardson 2006) and some species of birds (Raihani & Ridley 2008; Kleindorfer *et al.* 2014;  
114 Chen *et al.* 2016).

115

116 In stark contrast to human teaching, all known cases of teaching in other species occur in a  
117 single context. Meerkats, for example are known to teach pups to handle difficult prey items  
118 by gradually introducing them to live prey (Thornton & McAuliffe 2006), but there is no  
119 evidence of teaching in other contexts (Thornton 2008; Thornton & Malapert 2009). Thus, if  
120 the mobbing-like response to SPCs serves in part as a form of teaching, then this would  
121 provide the first evidence for teaching in multiple contexts outside of humans. Passive social  
122 learning may be sufficient to learn about SPCs through group recruitment events. However,  
123 the unusual mobbing-like response in meerkats raises the possibility that there is an additional  
124 aspect of this behaviour. Specifically, by inspecting and responding conspicuously to SPCs in  
125 the presence of pups, adults could incite naïve pups to approach investigate the cue  
126 themselves. Exaggerated mobbing-like responses could therefore provide valuable  
127 opportunities for pups to learn about predator characteristics (e.g. odour) and appropriate  
128 behavioural responses in a relatively safer environment.

129

130 In this study we used experimental presentations to investigate whether the mobbing-like  
131 response to SPCs functions as a form of teaching in wild meerkats. Meerkats are cooperatively

132 breeding mongooses from the arid regions of southern Africa, in which all group members  
133 help to rear dependent pups (aged 0-3 months) (for more detailed information see: Clutton-  
134 Brock & Manser 2016). Meerkat pups make extensive use of social information in the  
135 development of foraging skills and anti-predator responses (Hollén & Manser 2006; Hollén *et*  
136 *al.* 2008; Thornton & Clutton-brock 2011) and are known to learn hunting skills via teaching  
137 (Thornton & McAuliffe 2006). We tested whether mobbing-like responses towards SPCs may  
138 constitute another form of teaching in animals, with adults modifying their behaviour so as to  
139 promote learning in pups. Specifically we predicted that, as per the first criterion of Caro and  
140 Hauser's definition of teaching (Caro & Hauser 1992), adults should increase the intensity of  
141 their mobbing-like response (raised tails; piloerection; recruitment calls; (Graw & Manser  
142 2007)) would be greater when pups were present and when cues were novel to the pups but  
143 not to adults.

144

## 145 **Methods**

146

### 147 *Study site & species*

148 Experiments were carried out on six groups of wild meerkats at the Kalahari Meerkat Project  
149 in and around the Kuruman River Reserve, South Africa (Clutton-Brock *et al.* 1998). All  
150 members of the population used in the experiments were habituated to observations at < 1m,  
151 with individuals identifiable from unique dye marks on their backs (Jordan *et al.* 2007). Group  
152 sizes ranged from 3-24 and the life history of all group members were known as part of long-  
153 term study of the population for over 20 years.

154

### 155 *Cues*

156 We presented two different cue types: (1) domestic cat, *Felis catus*, urine samples, obtained  
157 from local veterinary surgeries during medical procedures and stored in the freezer and (2)  
158 African wildcat, *Felis lybica*, fur samples, obtained from a recently deceased individual found  
159 (within 6 hours of death) on the reserve and stored in the freezer. Both domestic cats and



160 wildcats are common predators on the reserve. Adults were likely to have encountered the  
161 predators and their associated cues previously but, given the frequency of predator  
162 encounters, it was highly likely that pups were naïve. Pilot studies determined that adults  
163 responded to both predator cues with a mobbing-like response. Samples were portioned into  
164 5mls of urine and 0.1g of fur and stored at -20°C. To ensure that meerkats were responding  
165 specifically to the cues and not the experimental set-up, equivalent quantities of water and dry  
166 grass were used as matched controls for the urine and fur respectively. We removed cues  
167 from the freezer to defrost 2-3 hours before presentation, keeping them in a cool bag with ice  
168 blocks until presentation and wore latex gloves to avoid contaminating the cues with human  
169 scent.

170

#### 171 *Presentations*

172 We conducted presentations while the group were foraging in the morning. The first trial at a  
173 group was after pups had been born, but were still being babysat at the burrow, and had not  
174 begun foraging with the group (no pups: NP). This allowed conditions to be kept as similar as  
175 possible across trials (including hormonal changes associated with reproductive events), while  
176 still allowing comparison of trials with and without pups. Pups began foraging with the group  
177 at around three to four weeks of age, but initially spent much of their time in sheltered locations  
178 (e.g. in boltholes or under bushes) begging for food and did not participate in group alarm or  
179 mobbing events. The second trial, with pups present (pups present 1: PP1) was conducted  
180 when pups were approximately six-seven weeks ( $21 \pm 3$  days after they began foraging with  
181 the group) and spent the majority of the time actively moving between helpers. Subsequent  
182 trials (pups present 2 and 3: PP2 and PP3) were conducted at one week ( $7 \pm 1$  day) intervals.  
183 For trials 1-3 (NP, PP1, PP2) the same cue type was used and for trial 4 (PP3) a different cue  
184 was used, representing a novel cue (Table 1). We predicted that adults would show the lowest  
185 mobbing intensity to PP2 as the cue type was not novel to pups or adults. Half of the groups  
186 were presented one combination of cues (Group A – urine, urine, urine, fur) and the other  
187 were presented the opposite (Group B – fur, fur, fur, urine). For each trial a cue was presented

188 and a control, with a randomised order of predator or control presentation. The second cue  
 189 was presented ten minutes after the interaction with the initial presentation had ended.  
 190

|                       | <b>Trial 1 – NP</b>           |        | <b>Trial 2 – PP1</b>                   |        | <b>Trial 3 – PP2</b>                   |        | <b>Trial 4 – PP3</b>                   |          |
|-----------------------|-------------------------------|--------|----------------------------------------|--------|----------------------------------------|--------|----------------------------------------|----------|
| <b>Treatment</b>      | No pups                       |        | Pups present 1                         |        | Pups present 2                         |        | Pups present 3                         |          |
| <b>Cue</b>            | A. Urine                      | B. Fur | A. Urine                               | B. Fur | A. Urine                               | B. Fur | A. Fur                                 | B. Urine |
| <b>Cue novelty?</b>   | N/A                           |        | Yes – to pups                          |        | No                                     |        | Yes – to pups                          |          |
| <b>Pup age</b>        | 24 days ± 3 days              |        | 49 days ± 3 days                       |        | 56 days ± 3 days                       |        | 63 days ± 3 days                       |          |
| <b>Pups foraging?</b> | <i>Pups babysat at burrow</i> |        | <i>Foraging with group for 21 days</i> |        | <i>Foraging with group for 28 days</i> |        | <i>Foraging with group for 35 days</i> |          |

191 *Table 1. – Set up of the four experimental trials showing the conditions, cue type, cue novelty, pup*  
 192 *age and pup location.*

193 Cues were presented 30 minutes after the group had left the burrow in the morning to begin  
 194 foraging, and after at least 10 minutes of normal foraging behaviour following an alarm event,  
 195 so as to minimise the effect of any previous stress on responses to the presentation. The cues  
 196 were presented in a petri dish filled with sand at the end of a 1 m pole, to reduce association  
 197 of cues with the human presenter. One week prior to beginning the experimental presentations  
 198 the cue presentation apparatus was presented to all group members filled only with sand to  
 199 habituate them to the set up and ensure that responses during the experimental trials were to  
 200 the cue and not the apparatus. At the start of each trial, we presented the relevant cue to a  
 201 randomly selected target individual (non-pup, > 6 months) from the group. If the individual did  
 202 not initially respond to the cue, we presented it again up to three times. If this still did not elicit  
 203 a response the cue was presented to another randomly chosen individual to prevent over-  
 204 exposing any one individual to the cue. A trial began once an individual responded to and  
 205 began interacting with the cue. Trials were conducted at least one week apart to reduce



206 possible habituation to the cues. Presentations were video recorded using a GoPro (Hero 4)  
207 and audio recorded holding a microphone (Sennheiser ME 66 with a K6 powering  
208 module, sampling frequency 44.2 kHz, 16 bits accuracy) connected to a recorder (Marantz  
209 Solid State Recorder PMD661 MKII) at a distance of approximately 1-1.5m from the cue  
210 presentation (see *supplementary material for video example*).

211

### 212 *Behavioural analysis*

213 Video recordings were coded using the open-source software BORIS (Friard & Gamba 2016),  
214 noting the behaviours of each individual that interacted with the cue. Details and definitions of  
215 the behaviours recorded are given in Table 2. Only the behaviours of individuals that interacted  
216 with the cues were recorded. Presentations that elicited no response from the initial target  
217 individual were not included in the analysis unless subsequent presentations to the rest of the  
218 group did not elicit a response.

219

---

| <b>Behaviour</b> | <b>Description</b>                                                                                                                                                                                                                                                                                                                                                                                                                                                                                                                                                                 |
|------------------|------------------------------------------------------------------------------------------------------------------------------------------------------------------------------------------------------------------------------------------------------------------------------------------------------------------------------------------------------------------------------------------------------------------------------------------------------------------------------------------------------------------------------------------------------------------------------------|
| <b>Interact</b>  | <i>Duration of time spent interacting with the cue, when the individual was within 0.3 m of the cue following initial approach and exhibiting one of the following behaviours (indicating a direct interaction): facing the cue directly, touching and sniffing the cue, rocking back and forth facing the cue, tail raised, and piloerecting. Interaction ended when an individual was quadrupedally vigilant (scanning on four legs), on bipedal vigilance (scanning on two legs), or resumed foraging. A new interaction began if the individual started interacting again.</i> |

---

---

**Tail raise**                      *Tail raised vertically above the body within 0.5 m of the cue (within close proximity). Recorded the duration of time until the tail was lowered below horizontal with the body.*

---

**Piloerection**                      *Fur visibly raised within 0.5m of the cue (within close proximity). Recorded the duration of time until the fur was no longer visibly raised.*

---

**Recruitment Call**                      *The recruitment call type (low or high urgency) given in response to the cue presentation.*

---

*Table 2. – Ethogram of the behaviours analysed in response to the secondary predator cue presentations.*

220

221

222 *Acoustic analysis*

223 Acoustic recordings were analysed using RavenLite to determine the type of recruitment call  
224 given (high or low urgency) in response to the presentation (Bioacoustics Research Program  
225 2016). We recorded the duration of calling bouts and classified the urgency of recruitment  
226 calls based on the acoustic structure (outlined and defined in: Manser 2001; Manser *et al.*  
227 2001). Due to the nature of the audio recording method it was not possible to determine which  
228 individual was calling or how many individuals were calling, as typically several individuals  
229 were recruited to the cue simultaneously.

230

231 *Statistical analysis*

232 Statistical analysis was conducted with R version 1.1.463 (R Core Team 2015), using the  
233 packages *lme4* for Generalised Linear Mixed Model (GLMM) analyses. Group identity was  
234 fitted as a random term for analysis of group-level responses (analysis *a*), and individual and  
235 group ID were fitted as random terms in analyses of individual responses (*b-g*). Analyses were  
236 conducted on the behavioural responses of all non-pup (group members > 3 months; hereby

237 referred to as adults) individuals present for the experimental predator cue presentations.  
238 Model assumptions were checked using residual plot distribution techniques. We applied an  
239 information theoretic (IT) approach for model selection, using Akaike's information criterion  
240 (AIC) to rank the models following the approach used by Richards *et al.* (Richards *et al.* 2011).  
241 Models within  $AIC \leq 6$  of the model with the lowest AIC value formed the 'top set'. We then  
242 applied the 'nesting rule' to the top set, removing more complex versions of nested models  
243 from the top set so as to not retain overly complex models.

244

245 All models (*a-g*) included the explanatory terms: treatment (NP, PP1, PP2, PP3), cue type  
246 (fur, urine), number of pups (0-3 months old), and number of adult (> 3 months) group  
247 members. As individuals' responses may have been influenced by their group mates'  
248 behaviour, we also fitted the proportion of the group interacting with the cue (*b-g*) and the  
249 highest urgency level of call type heard in the group before each individual was recruited as  
250 additional explanatory terms (*a-g*). As the original target individual to whom the cue was  
251 presented could not, by definition, have heard any prior calls made in response to the cue,  
252 call type was categorised as target individual, no call, low urgency or high urgency. Individual  
253 age, sex, and dominance rank were initially included in the models but removed to reduce  
254 model complexity, as they never ranked in the top five models with the lowest AIC values  
255 during model selection. *A priori* combinations of fixed effects were used in model building  
256 based on biological-relevance.

257

258 As the number of pups in the NP treatment was, by definition, zero, the effects of treatment  
259 and number of pups could be correlated. To address this, we also ran the analysis with the  
260 results of the NP treatment excluded. The results of these models were qualitatively very  
261 similar to those conducted on the full dataset (see supplementary material, Table 1).

262

263 *Group-level response*

264 First, we analysed the influence of treatment, cue type, number of non-pup group members  
265 and number of pups on the group level response (*model a*). We used a GLMM with binomial  
266 error structure and logit link function, fitting the proportion of the number of individuals  
267 responding as the numerator and the total number of other adults present in the group as the  
268 denominator, to take into account variation in group size. For this analysis we grouped the  
269 recruitment events with low urgency calls and no calls given, to allow model convergence as  
270 there were only two instances of recruitment following no recruitment calls. These two  
271 categories were grouped as they were both representative of a lower perceived risk.

272

### 273 *Individual response*

274 We then used GLMMs to examine the factors influencing individual behaviour. We conducted  
275 a GLMM with binomial error structure and logit link function to examine how the explanatory  
276 terms outlined above, influence whether or not an individual interacted with the cue using a  
277 binary (0/1) response term (*model b*). We excluded the response of the original target  
278 individual presented to from this analysis as this interaction signified the beginning of the trial.  
279 Among those individuals that did interact, we examined the factors influencing the duration of  
280 interactions using a GLMM with a gamma error structure, for over-dispersed continuous data  
281 (Zuur *et al.* 2009; Richards *et al.* 2011), and log link function (*model c*). We also examined  
282 whether or not each of these interacting individuals raised their tail as a binary response term  
283 (0/1) using a GLMM with binomial error structure and logit link function (*model d*). For model  
284 d we grouped low urgency and no recruitment calls to allow model convergence, as there  
285 were only two instances of individuals raising their tails following no recruitment calls. Among  
286 those individuals that did raise their tails, we examined the factors influencing the duration of  
287 individual's tail raising using a GLMM with a gamma error structure and inverse link function  
288 (*model e*). We also examined whether or not the interacting individuals piloerected as a binary  
289 response term (0/1), using a GLMM with a binomial error structure and logit link function  
290 (*model f*). This analysis did not include call type, as no individual showed piloerection if no  
291 recruitment calls or low urgency calls had been heard in the group. Among those individuals

292 that did piloerect, we examined the duration of piloerection using a GLMM with a gamma error  
293 structure and log link function (*model g*).

294

#### 295 *Responses of pups*

296 At least one pup interacted with the cue presentation in 14/18 trials. Of 51 observations,  
297 representative of every pup in every trial contributing an observation, there were 19 instances  
298 of pups interacting with the predator cues. On average  $1.06 \pm 0.78$  (range: 0 to 3) pups were  
299 recruited to the predator cues. Pups' interactions lasted an average of  $46.10 \pm 9.02$  seconds.  
300 Among the pups that did interact 15/19 raised their tails for on average  $24.40 \pm 8.51$  seconds,  
301 and 5/19 piloerected for on average  $14.36 \pm 4.78$  seconds.

302

#### 303 *Responses of adults to control vs experimental stimuli*

304 In response to experimental SPCs individuals typically displayed a combination of responses  
305 of: approaching the stimuli, investigation of the cue (visually assessing, touching with paws  
306 and sniffing), recruitment calling, tail raising, piloerection, and in some cases head bobbing  
307 and rocking body movements. In total there were 48 cue presentations analysed (combined  
308 predator and control). For six out of the 24 predator cue presentations analysed, cues needed  
309 to be presented more than once to elicit a response. There was one instance in which all group  
310 members did not respond following three SPC presentations to each member of the group,  
311 the trial to the original target individual was used for the analysis. In one case the original  
312 target individual did not respond to the cue, but another individual came and investigated the  
313 cue independently and recruited other group members, this trial was also included in the  
314 analysis. Individuals never reacted to control presentations with more than a brief investigation  
315 and only those directly being presented with the control ever interacted with it. No recruitment  
316 calls were given to control cues and no individuals were recruited. Of the 24 control  
317 presentations 19 initial target individuals interacted with the control cue, as defined in Table  
318 2, and five did not interact with the cue at all after being presented to three times. Of those  
319 that did interact with the control cue, interactions lasted on average  $3.77 \pm 0.63$  seconds,

320 ranging between 0.75-11.25 seconds. Of the 19 individuals that did interact with the control  
321 cue only 4 raised their tails for an average of  $3.88 \pm 1.16$  seconds and none piloerected. Mean  
322 interaction duration with predator cues ( $29.66 \pm 2.64$  seconds), ranging between 1.75-131  
323 seconds, lasted approximately eight times longer than control cue interactions (paired t-test,  
324  $t_{23} = 6.587$ ,  $p < 0.001$ ). Control presentations were not included in the models due to this  
325 consistent lack of response.

326

### 327 *Group-level responses to SPCs*

328

#### 329 *(a) Proportion of the group recruited*

330 On average a proportion of  $0.34 \pm 0.02$  of all non-pup group members were recruited to the  
331 predator cue presentations following the response of the initial interacting individual, and this  
332 depended on the number of pups present in the group. GLMM analyses produced six models  
333 in the top set, of which one (model a.5; supplementary material 1 Table 3) was retained with  
334 the lowest AIC value. This model contained only the number of pups present in the group as  
335 a negative predictor of the proportion of the non-pup group members recruited (GLMM:  
336 estimate (SE) =  $-0.201(0.107)$ ,  $\chi^2 = 3.810$ ,  $p = 0.05$ ; Fig.1; supplementary material 1 Table 2).  
337 Call type appeared in the second highest-ranked model, but did not have a robust effect  
338 (GLMM: estimate (SE) =  $0.567(0.573)$ ,  $\chi^2 = 1.260$ ,  $p = 0.26$ ).

339



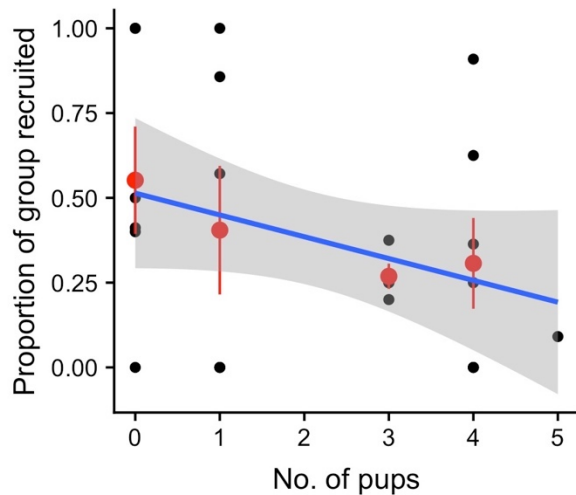

340

**Figure 1.** The overall proportion of the non-pup group members recruited dependent on the number of pups present in the group ( $n = 24$  presentations). Red points indicate the mean proportion recruited with error bars signifying standard error. Blue logistic regression line with the shaded area illustrating the 95% confidence interval.

341

#### 342 *Individual responses to SPCs*

343

##### 344 *(b) Interacted (y/n)*

345 Of the 202 observations, representative of every individual in every trial contributing an  
346 observation, 92 individuals interacted with the predator cue. Out of these 92 cases, 22 were  
347 the original target individuals to whom the cue was presented and the remaining 70 were  
348 subsequent recruits. GLMM analyses produced three models in the top set, of which one  
349 (model b.10; supplementary material Table 4) was retained following the application of the  
350 nesting rule. This model contained only the proportion of the group already interacting with the  
351 cue as a positive predictor of whether each new recruit interacted with the cue itself (GLMM:  
352 estimate (SE) = 2.992 (0.817),  $\chi^2 = 14.753$ ,  $p < 0.001$ ; Fig.2A; supplementary material Table  
353 2). Call type and treatment (models 9 and 11; supplementary material Table 5) appeared in  
354 the second and third highest-ranked models respectively, but neither factor appeared to have  
355 a robust effect (GLMM: Call type:  $\chi^2 = 1.906$ ,  $p = 0.39$ ; Treatment:  $\chi^2 = 2.732$ ,  $p = 0.43$ ;  
356 supplementary material Table 5).

357

##### 358 *(c) Interaction duration*

359 Individuals interacted with the predator cues for on average  $29.66 \pm 2.64$  seconds. GLMM  
360 analyses produced three models in the top set, of which one (model 5; supplementary material  
361 Table 6) was retained following the application of the nesting rule. This model contained only  
362 the predator cue type presented, with individuals interacting longer with fur cues,  $36.92 \pm 3.81$   
363 seconds, than urine cues,  $23.00 \pm 3.40$  seconds (GLMM: estimate (SE) =  $-0.511$  (0.169),  $\chi^2 =$   
364  $8.787$ ,  $p = 0.003$ ; Fig.3B; supplementary material Table 2). Treatment appeared in both the  
365 second and third highest-ranking models; when included with number of pups present, with  
366 both factors appeared to have an important effect (model 3; treatment:  $\chi^2 = 10.89$ ,  $p = 0.01$ ;  
367 number of pups: estimate (SE) =  $0.243$  (0.107),  $\chi^2 = 5.156$ ,  $p = 0.02$ ; Fig.3C supplementary  
368 material Table 6). However, when treatment was included with cue type, the effect of treatment  
369 was not robust (model 6; treatment:  $\chi^2 = 4.979$ ,  $p = 0.17$ ; Fig.3C; supplementary material table  
370 7). Interaction durations were greatest in NP ( $32.25 \pm 5.44$  seconds) and PP3 ( $34.90 \pm 4.87$   
371 seconds), when cues were novel to the group, and lower in PP1 ( $25.18 \pm 4.50$  seconds) and  
372 PP2 ( $23.32 \pm 6.54$  seconds) when cues were not novel. NP differed most from PP2 (effect size  
373 =  $0.35$ ,  $t = -2.19$ ,  $p = 0.03$ ; supplementary material Table 7), and less from PP1 (effect size =  
374  $0.28$ ,  $t = -1.09$ ,  $p = 0.27$ ; supplementary material Table 7) and PP3 (effect size =  $-0.10$ ,  $t = -$   
375  $0.63$ ,  $p = 0.53$ ; supplementary material Table 7).

376

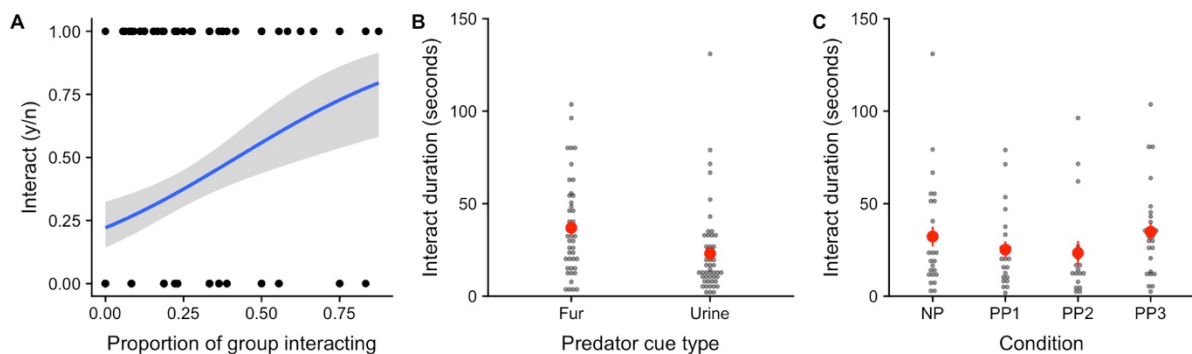

377

**Figure 2.** (A) The likelihood of an individual interacting with the cue yes ( $n = 92$ ) or no ( $n = 110$ ) dependent on the proportion of individuals in the group already interacting with the cue presentation prior to an individual beginning their interaction. Blue logistic regression line with the shaded area illustrating the 95% confidence interval. (B) The interaction duration in seconds of individuals that interacted with the presentation cues for the two cue types, fur ( $n = 44$ ) and urine ( $n = 48$ ), and (C) for each condition (no pups ( $n = 27$ ), pups present 1 ( $n = 22$ ), pups present 2 ( $n = 17$ ), pups present 3 ( $n = 26$ )). Red dots indicate the mean interaction duration for each cue type with error bars signifying the standard error.

378

379 (d) Tail raised (y/n)

380 Among those individuals that interacted with the predator cue, 70/92 raised their tails. GLMM  
381 analyses produced five models in the top set, of which two (model 4 and model 7:  
382 supplementary material Table 8) were retained following the application of the nesting rule.  
383 Model 4 contained only the number of pups present in the group as a negative predictor of  
384 whether an individual would raise their tail (GLMM: estimate (SE) = -0.691 (0.243),  $\chi^2 = 8.418$ ,  
385  $p = 0.004$ ; Fig.3A; supplementary material Table 2). Model 7 contained only the recruitment  
386 call type, with increased probability of individuals raising their tails following a high urgency  
387 recruitment call (estimate (SE) = 2.398 (0.818),  $\chi^2 = 9.892$ ,  $p = 0.007$ ; Fig.3b; supplementary  
388 material Table 2). The number of non-pups present in the group appeared in the top set (model  
389 13; supplementary material Table 8) having a positive effect on tail raising likelihood when  
390 included with the number of pups (GLMM; estimate (SE) = -0.691 (0.243),  $\chi^2 = 0.324$ ,  $p =$   
391  $0.04$ ), whereas treatment and proportion recruited (models 13, 8 and 9; supplementary  
392 material Table 8) also appeared in the top set, but did not have a robust effect (GLMM;  
393 Treatment:  $\chi^2 = 7.08$ ,  $p = 0.07$ ; Proportion recruited: estimate (SE) = -1.350(1.442),  $\chi^2 =$   
394  $0.874$ ,  $p = 0.25$ ; supplementary material table 9).

395

396 (e) Tail raised duration

397 The duration that individuals raised their tails for ranged 0.50-57.01 seconds with a mean of  
398  $13.89 \pm 1.52$  seconds. GLMM analyses produced three models in the top set, of which one  
399 (model 4; supplementary material Table 10) was retained following the application of the  
400 nesting rule. This model contained only the number of pups present in the group as a negative  
401 predictor of tail raised duration (GLMM: estimate (SE) = 0.016(0.004),  $\chi^2 = 16.144$ ,  $p < 0.001$ ;

402 Fig.3C; supplementary material Table 2). Tail raised duration was greatest when there were  
 403 no pups present,  $20.52 \pm 3.28$  seconds, and lowest when there were the largest possible  
 404 number of four pups present,  $5.09 \pm 1.17$  seconds. Number of non-pups and treatment (models  
 405 13 and 3; supplementary material Table 8) also appeared in the top set but did not have a  
 406 robust effect (GLMM; Number of non-pups: estimate (SE) =  $-0.001$  (0.005),  $\chi^2 = 16.144$ ,  $p =$   
 407  $0.77$ ; Treatment:  $\chi^2 = 2.22$ ,  $p = 0.53$ ; supplementary material Table 11).  
 408

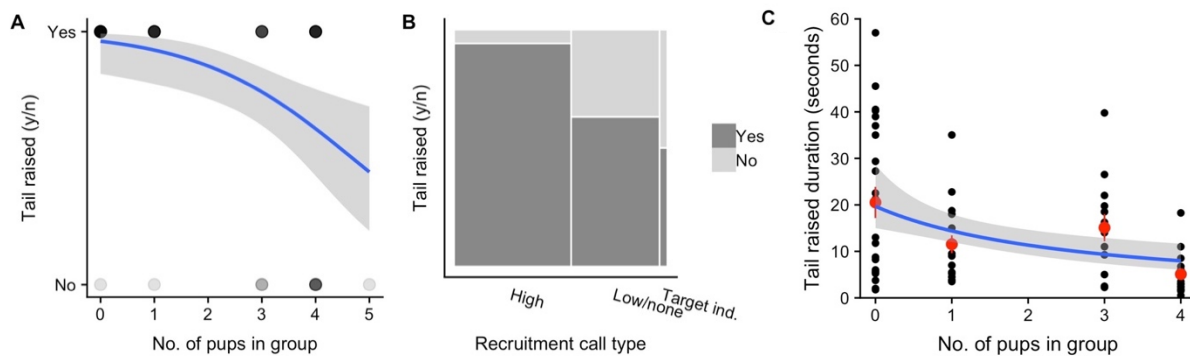

409  
 410

**Figure 3.** (A) The likelihood of an individual interacting with the presentation cue raising their tail yes ( $n = 70$ ) or no ( $n = 22$ ) dependent on the total number of pups present in the group, and (B) recruitment call type given during presentation (high urgency, low urgency or no call given, the target individual the cue was presented to). The points shading indicates the frequency of overlapping data points. Blue logistic regression line with the shaded area illustrating the 95% confidence interval. The bar surface area indicates relative frequency of response type. (C) The duration in seconds an individual raised their tail for, of the individuals that did raise their tail during an interaction with the predator cue ( $n = 70$ ) dependent on the total number of pups present in the group. Red points indicate mean tail raised duration with error bars signifying standard error. Blue linear regression line with the shaded area illustrating the 95% confidence interval.

415

416 (f) Piloerection (y/n)

417 Of the 92 individuals interacting with the cues, 38 individuals piloerected: 7/38 when  
 418 interacting with a fur cue and 31/38 when interacting with a urine cue. GLMM analyses  
 419 produced four models in the top set, of which two (model 5 and 10; supplementary material  
 420 Table 12) were retained following application of the nesting rule. Model 5 contained only the  
 421 predator cue type, with individuals more likely to piloerect when interacting with a urine cue  
 422 than a fur cue (GLMM: estimate (SE) =  $2.333$ ( $0.701$ ),  $\chi^2 = 13.542$ ,  $p < 0.001$ ; Fig.4A;  
 423 supplementary material Table 2). Model 10 contained only the proportion of adults recruited  
 424 as a negative predictor of whether an individual piloerected (estimate (SE) =  $5.359$ , ( $1.767$ ),

425  $\chi^2 = 12.782$ ,  $p < 0.001$ ). Treatment did appear in the top set (model 11; supplementary  
426 material Table 12) but did not have a robust effect ( $\chi^2 = 3.915$ ,  $p = 0.27$ ; supplementary  
427 material table 13). Individuals never piloerected following a low urgency or no recruitment call.

428

429 (g) *Piloerection duration*

430 Piloerection duration ranged from 2.25-62.01 seconds with a mean duration of  $19.42 \pm 2.26$   
431 seconds. GLMM analyses produced four models in the top set, of which two (model 13 &  
432 model 2; supplementary material Table 14) were retained. Model 13 contained the number of  
433 non-pups and the number of pups present in the group. There was a positive relationship  
434 between piloerection duration and the number of non-pups (GLMM: estimate (SE) = 0.123  
435 (0.038),  $\chi^2 = 8.488$ ,  $p = 0.004$ ; Fig.4B; supplementary material Table 2). In contrast, the  
436 duration of piloerection declined as the number of pups increased (estimate (SE) = -  
437 0.189(0.060),  $\chi^2 = 7.487$ ,  $p = 0.006$ ; Fig.4C; supplementary material Table 2). Model 2,  
438 containing only treatment, also appeared in the top set ( $\chi^2 = 18.203$ ,  $p < 0.001$  supplementary  
439 material table 15). Individuals piloerected for longer durations when no pups were present  
440 (NP;  $29.94 \pm 54.97$  seconds; supplementary material Table 2) than in all pup present  
441 treatments: PP1 ( $13.45 \pm 2.67$ ; effect size (relative to NP) = -1.17,  $t = -4.21$ ,  $p < 0.001$ ;  
442 supplementary material Table 11); PP2 ( $17.73 \pm 4.70$ ; effect size = -0.86,  $t = -3.66$ ,  $p < 0.001$ ;  
443 supplementary material Table 15); PP3 ( $13.94 \pm 2.91$ ; effect size = -1.13,  $t = -4.18$ ,  $p < 0.001$ ;  
444 supplementary material Table 15).

445

446

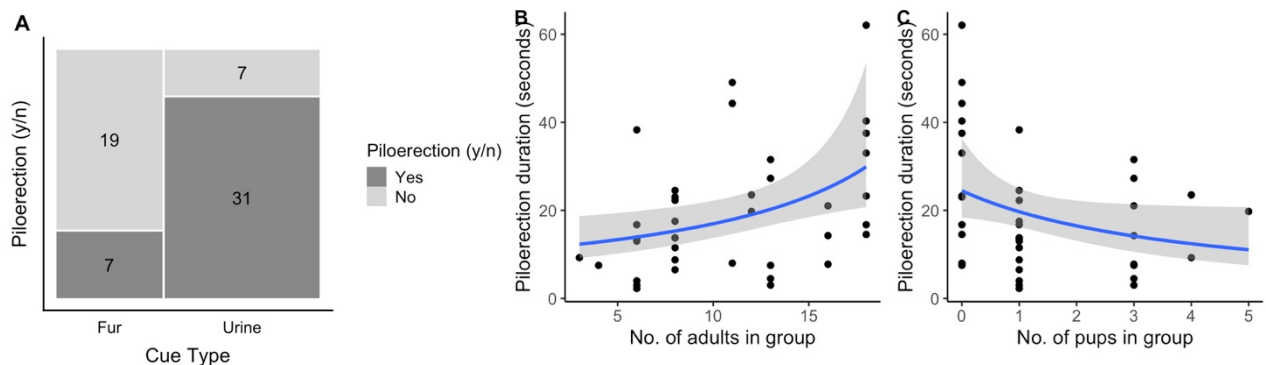

...

**Figure 4.** (A) The number of individuals that piloerected yes ( $n = 38$ ) or no ( $n = 54$ ) of those individuals interacting with the cue presentation that did piloerect for the two cue types, fur or urine. Dark grey shading indicates those individuals that did piloerect and light grey those that did not. The count for each is displayed within bar. (B) The piloerection duration for individuals interacting with the cue presentations that did piloerect ( $n = 38$ ) dependent on the total number of adults present in the group and, (C) the total number of pups present in the group. Blue linear regression line with the shaded area illustrating the 95% confidence interval.

448

449

## 450 Discussion

451

452 Meerkats' mobbing-like responses towards secondary predator cues seems perplexing, given  
453 that unlike most instances of mobbing in the animal kingdom, it cannot help to drive predators  
454 away. We tested whether adults may instead use exaggerated mobbing-like responses to  
455 SPCs to teach naïve pups, but our results provided no evidence that this is the case. Contrary  
456 to our predictions, we found that adults *reduced* their mobbing-like response intensity when  
457 pups were present, particularly when more pups were present. These results strongly suggest  
458 that meerkats do not use mobbing-like responses towards SPCs as a form of teaching.  
459 Instead, we suggest that this behaviour may help to recruit other mature group members to  
460 investigate the cue and gather information to mount appropriate defensive responses.

461

462 We predicted that adults would exaggerate their mobbing-like response when pups were  
463 present and foraging with the group and that responses would be particularly exaggerated  
464 when cues were novel to pups. None of the analyses supported these predictions, as  
465 experimental treatment (NP, PP1, PP2, PP3 where PP3 was always a novel cue) did not  
466 appear to influence most of the responses investigated. There was some evidence that  
467 experimental treatment had a modest effect on interaction and piloerection duration, with  
468 interaction duration greatest when cues were novel to the group, suggestive of possible  
469 habituation through order effects. This habituation seems to have broken when a new cue (cat  
470 fur instead of cat urine, or vice versa) was presented, returning response duration to the same  
471 baseline regardless of whether pups were present. It therefore seems likely that interaction



472 and piloerection duration were related to cue familiarity and presentation order rather than the  
473 presence or absence of pups.

474

475 Piloerection duration, an indicator of intensity, was reduced in the presence of pups  
476 irrespective of cue novelty suggesting an overall effect of pups in reducing response intensity.

477 In the analyses of the proportion of the group recruited to inspect the SPC, whether or not

478 interacting individuals raised their tail, and the duration of tail raising and piloerection, larger

479 numbers of pups appeared to have an inhibitory effect on response intensity. The effect of the

480 number of pups was reduced when the NP treatment was excluded from the analysis for the

481 proportion of the group recruited, whether an individual raised their tail and piloerection

482 duration, but maintained for tail raising duration (supplementary material Table 1). This

483 suggests the presence of pups alone rather than the increasing number may drive this effect

484 in the full data set. The reduction in response intensity could reflect the additional costs

485 associated with provisioning pups, limiting investment in other activities. Alternatively, the high

486 intensity of a mobbing-like response is by definition conspicuous; therefore reducing intensity

487 when vulnerable pups are present may reduce conspicuousness and risk to pups in an area

488 of higher perceived predation risk. Meerkats have been observed leading pups away from a

489 predator mobbing location and therefore away from an area of increased risk (M. Manser,

490 *pers. comm.*, February 2020). Thus, although meerkats are known to teach their pups how to

491 hunt effectively (Thornton & McAuliffe 2006), they do not appear to use responses to SPCs to

492 teach pups about potential predators.

493

494 If mobbing-like response to SPCs do not play a role in teaching naïve pups, what could be the

495 function of this unusual behaviour? One possible explanation is that mobbing-like response to

496 SPCs is a maladaptive by-product of arousal. Individuals clearly responded to the SPCs and

497 not controls as threats, behaving similarly to how they would respond to a predator (Graw &

498 Manser 2007). This high intensity response to SPCs may represent a misidentification of a

499 SPC as an actual threat. However, rather than ceasing to respond to the stimuli after direct

500 investigation, individuals tended to continue the mobbing-like behaviours whilst investigating  
501 the cues directly sniffing and scratching them. This suggests no error in classification and an  
502 awareness that the cue itself is not a threat. This cue recognition is further illustrated in the  
503 difference in response to fur versus urine cues, suggesting even a distinction within predator  
504 cue types. Interaction duration was longer for fur cues, but individuals were more likely to show  
505 the high arousal piloerection response to urine cues, possibly related to perceived risk  
506 associated. Moreover, although the mobbing-like response to SPCs is without the major costs  
507 associated with mobbing (injury, death), there are still substantial energetic, time, opportunity  
508 and conspicuousness costs of the mobbing-like response, illustrated by the reduction in  
509 response intensity potentially due to additional costs posed by pups. If there were no benefit  
510 gained from such a costly response to SPCs, it would be expected that selection would act  
511 against the persistence of this behaviour.

512

513 Arguably, a more plausible explanation is that the mobbing-like response to SPCs could play  
514 a role in information transfer. The raising of group knowledge and alertness through  
515 recruitment to SPCs can reduce risk to all members, raising vigilance and increasing speed  
516 of potential predator detection (Zöttl *et al.* 2013). A mobbing-like response may increase the  
517 probability of recruiting other group members by providing a conspicuous, localisable signal  
518 of risk. Consistent with this, our results indicate an increased probability of individuals  
519 recruiting when a higher proportion of the group is already interacting with the cue. In larger  
520 groups where individuals may be more dispersed (Focardi & Pecchioli 2005) signals may need  
521 to be more conspicuous to increase the probability of others receiving the signal. Inspection  
522 of cues may increase individual knowledge of the type of threat thus facilitating more targeted  
523 predator detection and defences. For example, stoats, *Mustela erminea*, respond with  
524 differences in scanning behaviour dependent on the source of the scent and effectiveness of  
525 the defensive response (Garvey *et al.* 2016). Previous work on meerkats has demonstrated  
526 more rapid detection of a nearby predator model following an SPC encounter (Zöttl *et al.*  
527 2013), predator detection was not necessarily by the individual that had interacted with the

528 cue. In addition, meerkats also show an increase in alarm calling frequency and reduce  
529 distance travelled following a natural SPC encounter (Driscoll *et al.* 2020). This supports the  
530 idea that group-level defensive responses may be enhanced by alerting conspecifics of  
531 increased risk, with recruitment further improving their knowledge of the threat.

532

533 Although meerkats do not appear to exaggerate their responses to SPCs as a form of  
534 teaching, these responses may nevertheless provide opportunities for inadvertent social  
535 learning via stimulus enhancement and/or observational conditioning. Inadvertent social  
536 learning is characterised as the transmission of learnt information between individuals without  
537 the need for experienced individuals to adjust their behaviour (Hoppitt *et al.* 2008). Meerkat  
538 pups may have sufficient inadvertent learning opportunities through observing knowledgeable  
539 group members' high intensity responses to SPCs, without the need for exaggerated adult  
540 responses. A similar argument can be made for mobbing of actual predators: here, social  
541 learning may not be the primary adaptive function, but can be an additional benefit (Curio *et*  
542 *al.* 1978a; Griesser & Suzuki 2017). Whether meerkats, and other animals, learn socially from  
543 other individuals' responses to SPCs remains to be investigated. This could be achieved by  
544 assessing whether naïve individuals' responses towards SPCs (and the actual predators with  
545 which those SPCs are associated) change after observing a knowledgeable individual  
546 interacting with the cue.

547

548 The lack of evidence for teaching in this context may provide support for the idea that, in  
549 contrast to human teaching, which occurs across many contexts, non-human teaching is an  
550 adaptation to promote context-specific learning (Thornton & Raihani 2008). Teaching has  
551 evolved in other species when acquisition of information or a behaviour by asocial or passive  
552 social learning would be slow/dangerous or not occur at all. In the context of the mobbing-like  
553 response to SPCs, pups may have ample opportunities to learn this behaviour by watching  
554 adults' responses, so there is no benefit for adults modifying their behaviour to promote  
555 learning. For example, meerkat pups' responses to alarm calls become more adult-like with

556 age, suggesting the development of experience-dependent appropriate responses to alarm  
557 calls, likely as a result of social learning, without adults altering their behaviour (Hollén &  
558 Manser 2006; Hollén *et al.* 2008). However, further research needs to be conducted on  
559 possible candidate behaviours for teaching in non-human animals to assess whether humans  
560 are the only species to perform flexible multi-context teaching.

561

#### 562 **Acknowledgments:**

563 We thank the Kalahari Research Trust and the Northern Cape Conservation Authority for  
564 research permission (FAUNA 1020/2016). We also thank Dave Gaynor and Tim Vink for  
565 organising the field site, as well as the managers Coline Muller and Jacob Brown, and  
566 volunteers of the Kalahari Meerkat Project for organising, providing support and helping to  
567 collect the life history data and maintain habituation of the meerkats. Furthermore, we thank  
568 Michael Cant and Andrew Radford for providing valuable comments which helped improve  
569 this manuscript.

570

#### 571 **References:**

572

573 Abolins-Abols, M. & Ketterson, E.D. (2017). Condition explains individual variation in  
574 mobbing behavior. *Ethology*, 123, 495–502.

575 Amo, L., López, P. & Martín, J. (2004). Wall lizards combine chemical and visual cues of  
576 ambush snake predators to avoid overestimating risk inside refuges. *Anim. Behav.*, 67,  
577 647–653.

578 Apfelbach, R., Soini, H.A., Vasilieva, N.Y. & Novotny, M. V. (2015). Behavioral responses of  
579 predator-naïve dwarf hamsters (*Phodopus campbelli*) to odor cues of the European  
580 ferret fed with different prey species. *Physiol. Behav.*, 146, 57–66.

581 Barnes, M.C., Persons, M.H. & Rypstra, A.L. (2002). The effect of predator chemical cue  
582 age on antipredator behavior in the wolf spider *Pardosa milvina* (Araneae: Lycosidae).  
583 *J. Insect Behav.*, 15, 269–281.

- 584 Belton, L.E., Ball, N., Waterman, J.M. & Bateman, P.W. (2007). Do Cape ground squirrels  
585 (*Xerus inauris*) discriminate between olfactory cues in the faeces of predators versus  
586 non-predators? *African Zool.*, 42, 135–138.
- 587 Bioacoustics Research Program. (2016). RavenLite: Interactive Sound Analysis Software.
- 588 Van Buskirk, J. (2001). Specific induced responses to different predator species in anuran  
589 larvae. *J. Evol. Biol.*, 14, 482–489.
- 590 Caro, T. (2005). *Antipredator defenses in birds and mammals*. University of Chicago Press,  
591 Chicago.
- 592 Caro, T.M. & Hauser, M.D. (1992). Is There teaching in Non-Human Animals? *Q. Rev. Biol.*,  
593 67, 151–174.
- 594 Chen, Y., Matheson, L.E. & Sakata, J.T. (2016). Mechanisms underlying the social  
595 enhancement of vocal learning in songbirds. *Proc. Natl. Acad. Sci.*, 113, 6641–6646.
- 596 Clutton-Brock, T., Gaynor, D., Kansky, R., MacColl, A.D.C., Mcllraith, G., Chadwick, P., *et al.*  
597 (1998). Costs of Cooperative Behaviour in Suricatas (*Suricata Suricatta*). *Proc. R. Soc.*  
598 *B*, 265, 185–190.
- 599 Clutton-Brock, T. & Manser, M. (2016). Meerkats : Cooperative breeding in the Kalahari. In:  
600 *Cooperative Breeding in Vertebrates: Studies of Ecology, Evolution, and Behavior*. pp.  
601 294–317.
- 602 Collier, K., Radford, A.N., Townsend, S.W. & Manser, M.B. (2017). Wild dwarf mongooses  
603 produce general alert and predator-specific alarm calls. *Behav. Ecol.*, 28, 1293–1301.
- 604 Cornell, H.N., Marzluff, J.M. & Pecoraro, S. (2012). Social learning spreads knowledge  
605 about dangerous humans among American crows. *Proc. R. Soc. B*, 279, 499–508.
- 606 Crane, A.L. & Ferrari, M.C.O. (2013). Social learning of predation risk: a review and  
607 prospectus. In: *Social Learning Theory*. pp. 53–82.
- 608 Curio, E., Ernst, U. & Vieth, W. (1978a). Cultural transmission of enemy recognition: one  
609 function of mobbing. *Science* , 202, 899–901.
- 610 Curio, E., Ernst, U. & Vieth, W. (1978b). The Adaptive Significance of Avian Mobbing. *Z.*  
611 *Tierpsychol.*, 48, 184–202.

- 612 Dall, S.R.X., Giraldeau, L.A., Olsson, O., McNamara, J.M. & Stephens, D.W. (2005).  
613 Information and its use by animals in evolutionary ecology. *Trends Ecol. Evol.*, 20, 187–  
614 193.
- 615 Davies, N.B. & Welbergen, J.A. (2009). Social Transmission of a Host Defense Against  
616 Cuckoo Parasitism. *Science*, 324, 1318–1321.
- 617 Driscoll, I., Manser, M. & Thornton, A. (2020). Mobbing-like response to secondary predator  
618 cues informs group behaviour in wild meerkats. *bioRxiv pre print*.
- 619 Feeney, W.E. & Langmore, N.E. (2013). Social learning of a brood parasite by its host. *Biol.*  
620 *Lett.*, 9.
- 621 Ferrari, M.C.O., Capitania-Kwok, T. & Chivers, D.P. (2006). The role of learning in the  
622 acquisition of threat-sensitive responses to predator odours. *Behav. Ecol. Sociobiol.*,  
623 60, 522–527.
- 624 Focardi, S. & Pecchioli, E. (2005). Social cohesion and foraging decrease with group size in  
625 fallow deer (*Dama dama*). *Behav. Ecol. Sociobiol.*, 59, 84–91.
- 626 Franks, N.R. & Richardson, T. (2006). Teaching in tandem-running ants. *Nature*, 439, 153.
- 627 Friard, O. & Gamba, M. (2016). BORIS: a free, versatile open-source event-logging software  
628 for video/audio coding and live observations. *Methods Ecol Evol*, 7, 1325–1330.
- 629 Furrer, R.D. & Manser, M.B. (2009). Banded mongoose recruitment calls convey information  
630 about risk and not stimulus type. *Anim. Behav.*, 78, 195–201.
- 631 Garvey, P.M., Glen, A.S. & Pech, R.P. (2016). Dominant predator odour triggers caution and  
632 eavesdropping behaviour in a mammalian mesopredator. *Behav. Ecol. Sociobiol.*, 70,  
633 481–492.
- 634 Graw, B. & Manser, M.B. (2007). The function of mobbing in cooperative meerkats. *Anim.*  
635 *Behav.*, 74, 507–517.
- 636 Griesser, M. & Suzuki, T.N. (2017). Naive Juveniles Are More Likely to Become Breeders  
637 after Witnessing Predator Mobbing. *Am. Nat.*, 189, 58–66.
- 638 Griffin, A.S. (2004). Social learning about predators: A review and prospectus. *Learn.*  
639 *Behav.*, 32, 131–140.



- 640 Hollén, L.I., Clutton-brock, T. & Manser, M.B. (2008). Ontogenetic changes in alarm-call  
641 production and usage in meerkats (*Suricata suricatta*): adaptations or constraints ?  
642 *Behav. Ecol. Sociobiol.*, 62, 821–829.
- 643 Hollén, L.I. & Manser, M.B. (2006). Ontogeny of alarm call responses in meerkats, *Suricata*  
644 *suricatta*: the roles of age, sex and nearby conspecifics. *Anim. Behav.*, 72, 1345–1353.
- 645 Hoppitt, W.J.E., Brown, G.R., Kendal, R., Rendell, L., Thornton, A., Webster, M.M., *et al.*  
646 (2008). Lessons from animal teaching. *Trends Ecol. Evol.*, 23, 486–493.
- 647 Jordan, N.R., Cherry, M.I. & Manser, M.B. (2007). Latrine distribution and patterns of use by  
648 wild meerkats: implications for territory and mate defence. *Anim. Behav.*, 73, 613–622.
- 649 Kleindorfer, S., Hoi, H., Evans, C., Mahr, K., Robertson, J., Hauber, M.E., *et al.* (2014). The  
650 cost of teaching embryos in superb fairy-wrens. *Behav. Ecol.*, 25, 1131–1135.
- 651 Krama, T. & Krams, I. (2005). Cost of mobbing call to breeding pied flycatcher, *Ficedula*  
652 *hypoleuca*. *Behav. Ecol.*, 16, 37–40.
- 653 Kuijper, D.P.J., Verwijmeren, M., Churski, M., Zbyryt, A., Schmidt, K., Jedrzejewska, B., *et*  
654 *al.* (2014). What cues do ungulates use to assess predation risk in dense temperate  
655 forests? *PLoS One*, 9, 1–12.
- 656 Kusch, R.C., Mirza, R.S. & Chivers, D.P. (2004). Making sense of predator scents:  
657 Investigating the sophistication of predator assessment abilities of fathead minnows.  
658 *Behav. Ecol. Sociobiol.*, 55, 551–555.
- 659 Lehtiniemi, M. (2005). Swim or hide: predator cues cause species specific reactions in  
660 young fish larvae. *J. Fish Biol.*, 66, 1285–1299.
- 661 Manser, M.B. (2001). The acoustic structure of suricates' alarm calls varies with predator  
662 type and the level of response urgency. *Proc. R. Soc. B*, 268, 2315–2324.
- 663 Manser, M.B., Bell, M.B. & Fletcher, L.B. (2001). The information that receivers extract from  
664 alarm calls in suricates. *Proc. R. Soc. B*, 268, 2485–2491.
- 665 Mathis, A. & Smith, R.J.F. (1993). Fathead minnows, *pimephales promelas*, learn to  
666 recognize northern pike, *esox lucius*, as predators on the basis of chemical stimuli from  
667 minnows in the pike's diet. *Anim. Behav.*, 46, 645–656.

- 668 McGregor, I.S., Schrama, L., Ambermoon, P. & Dielenberg, R.A. (2002). Not all “predator  
669 odours” are equal: Cat odour but not 2, 4, 5 trimethylthiazoline (TMT; fox odour) elicits  
670 specific defensive behaviours in rats. *Behav. Brain Res.*, 129, 1–16.
- 671 Mella, V.S.A., Cooper, C.E. & Davies, S.J.J.F. (2014). Behavioural responses of free-  
672 ranging western grey kangaroos (*Macropus fuliginosus*) to olfactory cues of historical  
673 and recently introduced predators. *Austral Ecol.*, 39, 115–121.
- 674 Monclús, R., Rödel, H.G., Von Holst, D. & De Miguel, J. (2005). Behavioural and  
675 physiological responses of naïve European rabbits to predator odour. *Anim. Behav.*, 70,  
676 753–761.
- 677 Nersesian, C.L., Banks, P.B. & McArthur, C. (2012). Behavioural responses to indirect and  
678 direct predator cues by a mammalian herbivore, the common brushtail possum. *Behav.*  
679 *Ecol. Sociobiol.*, 66, 47–55.
- 680 Persons, M.H., Walker, S.E., Rypstra, A.L. & Marshall, S.D. (2001). Wolf spider predator  
681 avoidance tactics and survival in the presence of diet-associated predator cues  
682 (Araneae: Lycosidae). *Anim. Behav.*, 61, 43–51.
- 683 R Core Team. (2015). R: A Language and Environment for Statistical Computing.
- 684 Raihani, N.J. & Ridley, A.R. (2008). Experimental evidence for teaching in wild pied  
685 babblers. *Anim. Behav.*, 75, 3–11.
- 686 Richards, S.A., Whittingham, M.J. & Stephens, P.A. (2011). Model selection and model  
687 averaging in behavioural ecology: The utility of the IT-AIC framework. *Behav. Ecol.*  
688 *Sociobiol.*, 65, 77–89.
- 689 Severud, W.J., Belant, J.L., Bruggink, J.G. & Windels, S.K. (2011). Predator cues reduce  
690 American beaver use of foraging trails. *Human-Wildlife Interact.*, 5, 296–305.
- 691 Shrader, A.M., Brown, J.S., Kerley, G.I.H. & Kotler, B.P. (2008). Do free-ranging domestic  
692 goats show “landscapes of fear”? Patch use in response to habitat features and  
693 predator cues. *J. Arid Environ.*, 72, 1811–1819.
- 694 Sullivan, A.M., Maerz, J.C. & Madison, D.M. (2002). Anti-predator response of red-backed  
695 salamanders (*Plethodon cinereus*) to chemical cues from garter snakes (*Thamnophis*

- 696 *sirtalis*): Laboratory and field experiments. *Behav. Ecol. Sociobiol.*, 51, 227–233.
- 697 Tanis, B.P., Bott, B. & Gaston, B.J. (2018). Sex-based differences in anti-predator response  
698 of crickets to chemical cues of a mammalian predator. *PeerJ*, 6, e4923.
- 699 Thornton, A. (2008). Social learning about novel foods in young meerkats. *Anim. Behav.*, 76,  
700 1411–1421.
- 701 Thornton, A. & Clutton-brock, T.H. (2011). Social learning and the development of individual  
702 and group behaviour in mammal societies. *Philos. Trans. R. Soc. B Biol. Sci.*, 366,  
703 978–87.
- 704 Thornton, A. & Malapert, A. (2009). Experimental evidence for social transmission of food  
705 acquisition techniques in wild meerkats. *Anim. Behav.*, 78, 255–264.
- 706 Thornton, A. & McAuliffe, K. (2006). Teaching in Wild Meerkats. *Science*, 313, 227–229.
- 707 Thornton, A. & Raihani, N.J. (2008). The evolution of teaching. *Anim. Behav.*, 75, 1823–  
708 2770.
- 709 Tórréz, L., Robles, N., González, A. & Crofoot, M.C. (2012). Risky Business? Lethal Attack  
710 by a Jaguar Sheds Light on the Costs of Predator Mobbing for Capuchins (*Cebus*  
711 *capucinus*). *Int. J. Primatol.*, 33, 440–446.
- 712 Zidar, J. & Løvlie, H. (2012). Scent of the enemy: Behavioural responses to predator faecal  
713 odour in the fowl. *Anim. Behav.*, 84, 547–554.
- 714 Zöttl, M., Lienert, R., Clutton-Brock, T., Millesi, E. & Manser, M.B. (2013). The effects of  
715 recruitment to direct predator cues on predator responses in meerkats. *Behav. Ecol.*,  
716 24, 198–204.
- 717 Zuur, A., Ieno, E.N., Walker, N., Saveliev, A.A. & Smith, G.. (2009). *Mixed effects models*  
718 *and extensions in ecology with R*. Springer.
- 719
